# Supplementary figures and images for: Genetic modification of tomato with the tobacco lycopene β-cyclase gene produces high β-carotene and lycopene fruit
Source: publisher site journal article supplement (doi:10.1515/znc-2016-0102), 2016-08-03

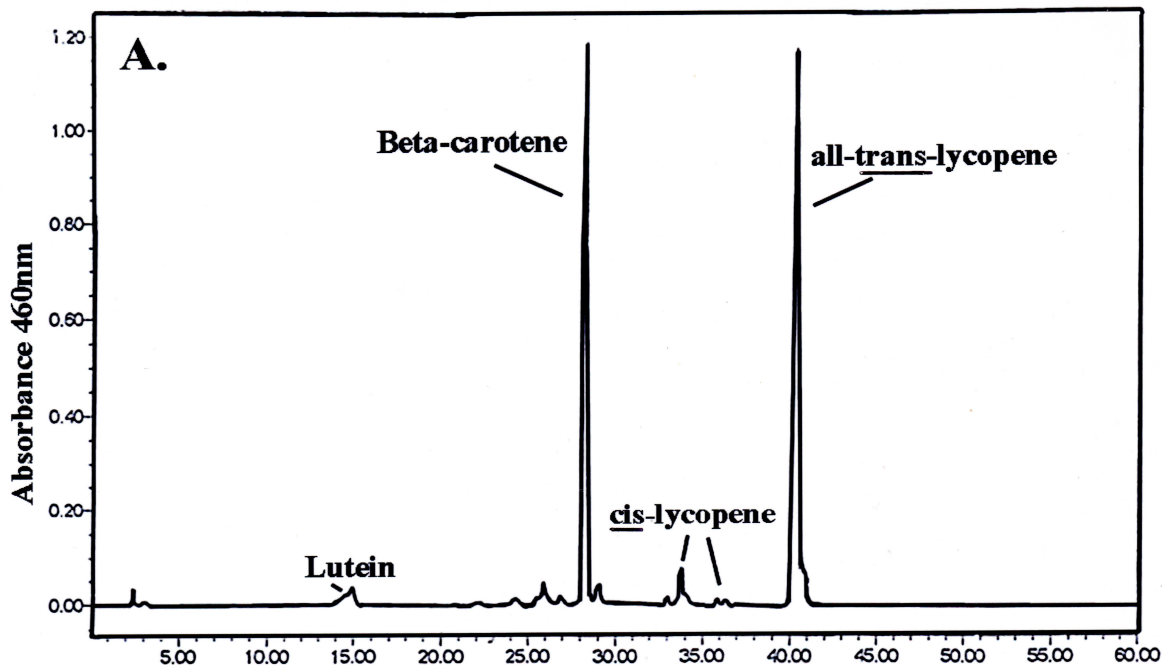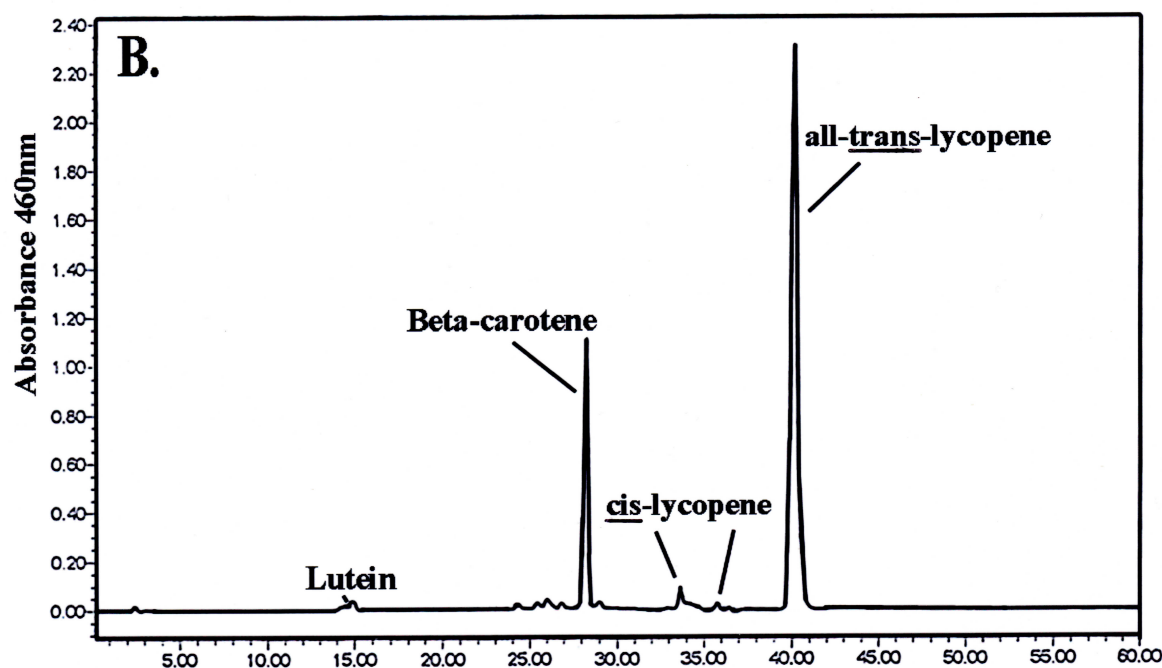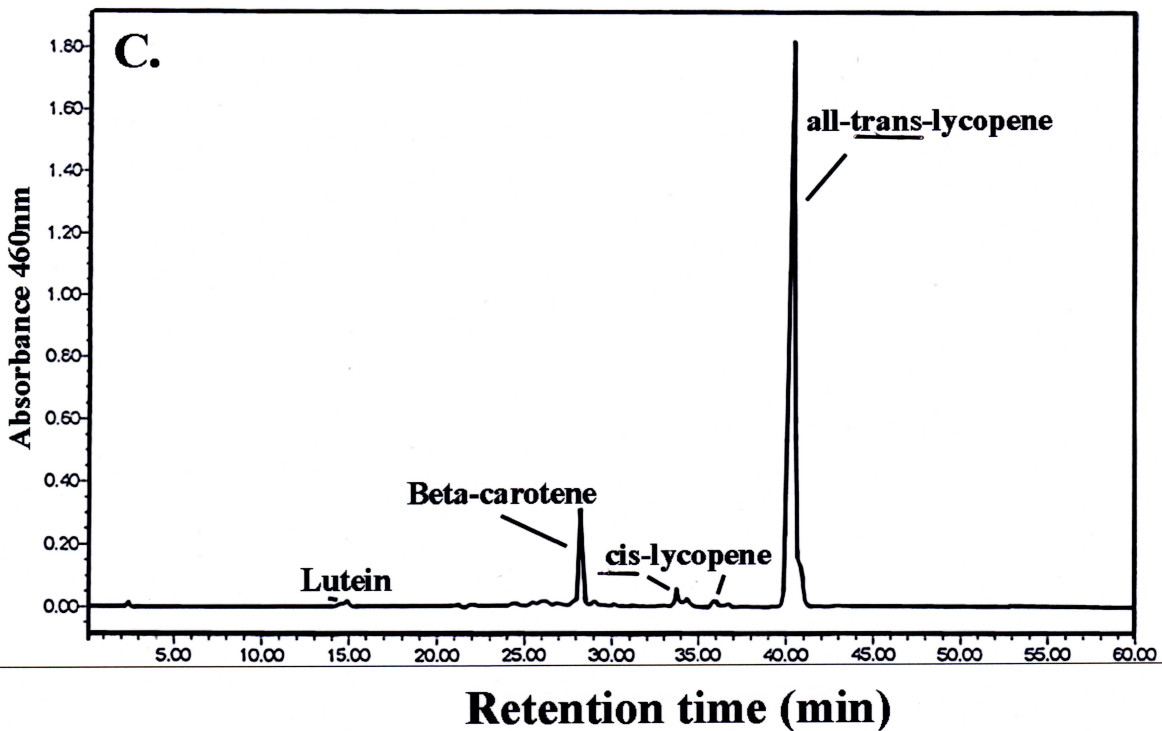

Supplement: Supplementary file 1 [file znc-2016-0102_Suppl.zip]

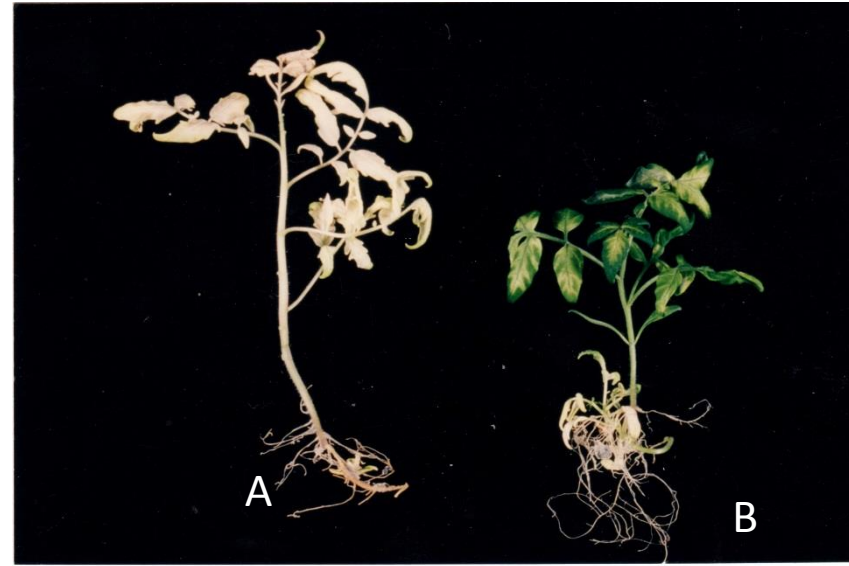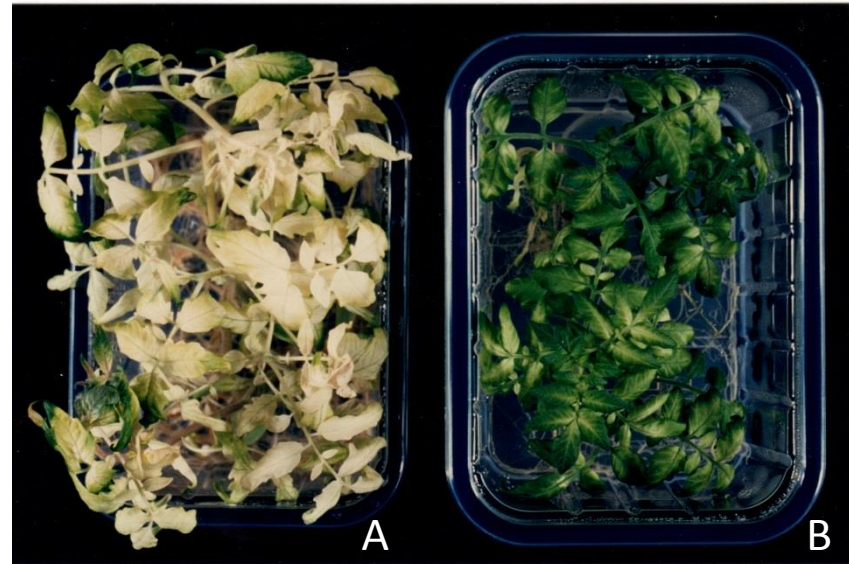

Supplement: Supplementary file 2 [file znc-2016-0102_Suppl.zip]
